# Supplementary material for: The Evolution of Cystic Echinococcosis in Humans and Ruminants in Portugal—A One Health Approach
Source: MDPI journal article supplement (doi:10.3390/vetsci10090584), 2023-09-21
Supplement: s1 [file s1]

**Supplementary Table S1.** Data on the number of cases of cystic echinococcosis in ruminants raised and slaughtered in Portugal, by district, from 2008 to 2022.

| <b>District</b>  | <b>Number of Cases</b> |
|------------------|------------------------|
| Aveiro           | 1                      |
| Beja             | 33                     |
| Braga            | 3                      |
| SBragança        | 28                     |
| Castelo Branco   | 6                      |
| Coimbra          | 5                      |
| Évora            | 44                     |
| Faro             | 17                     |
| Guarda           | 12                     |
| Leiria           | 39                     |
| Lisboa           | 1                      |
| Portalegre       | 72                     |
| Porto            | 3                      |
| Santarém         | 22                     |
| Setúbal          | 3                      |
| Viana do Castelo | 3                      |
| Vila Real        | 2                      |
| Viseu            | 4                      |
| <b>Total</b>     | <b>298</b>             |
